# Supplementary material for: Identification of Newly Committed Pancreatic Cells in the Adult Mouse Pancreas
Source: PubMed Central journal article supplement (PMC5727523; doi:10.1038/s41598-017-17884-z), 2017-12-13
Supplement: 41598_2017_17884_MOESM1_ESM.pdf [file 41598_2017_17884_MOESM1_ESM.pdf]

## Identification of Newly Committed Pancreatic Cells in the Adult Mouse Pancreas

Mairobys Socorro<sup>1,2,8</sup>, Angela Criscimanna<sup>1,2,8</sup>, Patricia Riva<sup>1,2</sup>, Manuj Tandon<sup>1,2</sup>, Krishna Prasad<sup>1,2</sup>, Ping Guo<sup>1,2,#</sup>, Abhinav Humar<sup>1</sup>, Sohail Z. Husain<sup>3</sup>, Steven D. Leach<sup>4</sup>, George K. Gittes<sup>1,2</sup>, and Farzad Esni<sup>1,2,5,6,7,\*</sup>

<sup>1</sup> Department of Surgery, <sup>2</sup> Division of Pediatric General and Thoracic Surgery, Children's Hospital of Pittsburgh, University of Pittsburgh Medical Center, One Children's Drive, 4401 Penn Avenue, Rangos Research Center, Pittsburgh, PA 15244, USA.

<sup>3</sup> Department of Pediatrics, Children's Hospital of Pittsburgh, University of Pittsburgh Medical Center, Pittsburgh, PA 15244, USA.

<sup>4</sup> Rubenstein Center for Pancreatic Cancer Research, Memorial Sloan Kettering Cancer Center, New York, NY, 10065, USA.

<sup>5</sup> Department of Developmental Biology, University of Pittsburgh, Pittsburgh, PA 15244, USA.

<sup>6</sup> Department of Microbiology and Molecular Genetics, University of Pittsburgh, Pittsburgh, PA 15244, USA.

<sup>7</sup> University of Pittsburgh Cancer Institute, Pittsburgh, PA, 15123, USA.

<sup>8</sup> These authors contributed equally to this work

# Current address: Department of Orthopaedic Surgery, University of Texas Health Science Center at Houston, 1881 East Road, 3SCR6.4621, Houston, Texas 77054

Correspondence and request for materials should be addressed to Farzad Esni (farzad.esni@chp.edu).

## Supplementary Figure Legends

**Supplementary Figure 1: Isolation of a pool of cells enriched for duct cells.** (A) Flow cytometric analysis of unstained cells, Ecadherin alone, DBA alone, or Ecadherin and DBA combined. This cell population is enriched for duct cells from the adult pancreas according to the protocol described in the Methods. (B) Representative flow cytometric analysis of ALDH-activity (Aldefluor) in a similar pool of cells enriched for duct cells from the pancreas of adult mice (n=10). (C) qRTPCR for insulin or amylase expression in duct cells (DBA<sup>+</sup>), Aldefluor<sup>+</sup> cells, or total pancreas (n=3, where each sample was pooled cells from 3-5 mice). (D, E) Representative flow cytometric analysis of ALDH-activity in cells from the pancreas of (D) post-natal mice (n=2, pooled samples from 7-10 pups for each time point), (E) pregnant (GD11 n=8, GD14 n=14, GD17 n=44) or postpartum dams (PP1 n=31, PP4 n=37, PP7 n=12, PP14 n=5, PP21 n=4). Aldefluor<sup>+</sup> cells are highly abundant before weaning in neonatal mice, as well as in pregnant and postpartum dams. Aldefluor<sup>+</sup> cells isolated from human pancreas display a similar expansion pattern to their mouse counterparts. P0-P21: post-natal days 0 to 21; GD11-GD17: gestational days 11 to 17; PP1-PP21: postpartum days 1 to 21; DBA: Dolichos Biflorus Agglutinin.

**Supplementary Figure 2: Cells with ALDH-activity are abundant in the mouse pancreas.** (A) Representative flow cytometric analysis of ALDH-activity (Aldefluor) in cells from the head, body or tail of the pancreas of pregnant mice (upper panel) showed equal distribution of Aldefluor<sup>+</sup> cells in different parts of the adult mouse pancreas. Flow cytometric analysis of Ecadherin expression in Aldefluor<sup>+</sup> cells from the head, body and tail of the pancreas of pregnant mice showed a similar ratio of Aldefluor<sup>+</sup>/Ecadherin<sup>+</sup> cells throughout the gland (lower panel) (n=5). (B) Representative flow cytometric analysis of Ecadherin and ALDH-activity (Aldefluor) in cells from the pancreas of gestational day 17 pregnant (n=24), or postpartum days 14 (n=10) or 21 dams (n=12). (C)

Quantification of percentages of Ecad<sup>+</sup> cells within the Aldefluor<sup>+</sup> population in the pancreas of non-pregnant (n=7), pregnant (GD11 n=5, GD14 n=14, GD17 n=24) or postpartum dams (PP1 n=25, PP4 n=26, PP7 n=12, PP14 n=5, PP21 n=4). (D) Representative flow cytometric analysis of F4/80 and CD11b, or CD31 expression in Aldefluor<sup>+</sup> cells from the pancreas of pregnant (GD17) dams, showing that Aldefluor<sup>+</sup> cells isolated from the pancreas are not macrophages nor endothelial cells (n=5). (E) Representative flow cytometric analysis of Ecadherin expression in Aldefluor<sup>+</sup> cells from the pancreas of postnatal day 7 pups (n=2, pooled samples from 7-10 pups), caerulein-treated (n=5) or diabetic NOD mice (n=4) showed expansion of both Ecadherin-positive as well as Ecadherin-negative cells in these conditions (n=5). (F) Representative flow cytometric analysis of Ecadherin expression in Aldefluor<sup>+</sup> cells from the pancreas of healthy pediatric (n=3), chronic pancreatitis (n=3), or T1D (n=3) patients showed expansion of both Ecadherin-positive as well as Ecadherin-negative cells in human pancreas.

**Supplementary Figure 3: Characterization of different Aldefluor<sup>+</sup> cell populations.** (A, B) Representative flow cytometric analysis of stem cell markers Sca-1, CD44, CD45, CD105, or CD133 expression, in Aldefluor<sup>+</sup> cells from the pancreas of non-pregnant (A), or postpartum (B) dams showing that Aldefluor<sup>+</sup> cells isolated from the mouse pancreas do not express the aforementioned stem cell markers (n=5).

**Supplementary Figure 4: Aldefluor<sup>+</sup> cells can be separated into four sub-populations.** (A) Representative flow cytometric analysis of Ecadherin and CD90 expression in Aldefluor<sup>+</sup> cells from the pancreas of gestational day 17 pregnant, postpartum days 14 and 21 dams. (B) Quantification of the actual number of the four Aldefluor<sup>+</sup> sub-population in the pancreas of non-pregnant adult, pregnant, or postpartum dams at indicated stages. GD: Gestational Day; PP: Postpartum. Results are expressed as the mean  $\pm$  SD. (C) Quantification of the percentage of the four Aldefluor<sup>+</sup> sub-population in the pancreas of non-pregnant adult, pregnant, or postpartum dams at indicated stages.

Results are expressed as the mean  $\pm$  SD. (D) Breakdown of pancreases at different gestational days (GD) or post-partum days (PP) that contain only CD90<sup>+</sup> cells. (A-C) non-pregnant (n=7), pregnant (GD11 n=5, GD14 n=4, GD17 n=4), postpartum dams (PP1 n=6, PP4 n=16, PP14 n=3, PP21 n=1).

**Supplementary Figure 5. The Aldefluor<sup>+</sup> cells display different degrees of heterogeneity within each sub-population.** The Aldefluor<sup>+</sup> cells isolated from the pancreas of postpartum day 1 dams were stained for CD90 and Ecadherin (left column), and the localization of each sub-population (black dots) was determined on the Aldefluor plot (middle column), or on the forward and side scatter plot (right column)

**Supplementary Figure 6: Gene expression analysis of different Aldefluor<sup>+</sup> cell populations.** (A) Hierarchical clustering of gene expression data among the cells analyzed in this study cluster CD90<sup>-</sup>/Ecad<sup>-</sup>, CD90<sup>+</sup>/Ecad<sup>-</sup>, and CD90<sup>+</sup>/Ecad<sup>+</sup> populations together, indicating that these three sub-populations may share the same origin. (B) Scatter plot demonstration of genes differentially expressed in CD90<sup>-</sup>/Ecad<sup>-</sup>, CD90<sup>+</sup>/Ecad<sup>-</sup>, and CD90<sup>+</sup>/Ecad<sup>+</sup> populations compared to CD90<sup>-</sup>/Ecad<sup>+</sup> cells. (n=3, where each sample was pooled cells from 3-5 mice).

**Supplementary Figure 7: Existence of Aldefluor<sup>+</sup>/CD29<sup>+</sup>/CD90<sup>-</sup>/Ecad<sup>-</sup> cells in the embryonic dorsal mesenchyme.** Representative flow cytometric analysis of ALDH1-activity, or Ecadherin and CD29 expression in Aldefluor<sup>+</sup> cells from the E10.5 dorsal pancreatic mesenchyme (dm) shows the presence of CD29<sup>+</sup>/CD90<sup>-</sup>/Ecad<sup>-</sup> cells in the mesenchyme surrounding the dorsal pancreatic anlagen (n=3, where each sample was pooled dorsal mesenchyme from 10-15 embryos).

**Supplementary Figure 8: Expansion of Aldefluor<sup>+</sup> cells in DT-treated PdxCre;R26<sup>DTR</sup> mice. (A)**

Whole-mount X-gal staining of DT-treated PdxCre;R26<sup>DTR/LacZ</sup> mice show that DT-treatment results into ablation of acinar and endocrine cells, while the ductal cells survive. (B) Flow cytometric analysis of ALDH1-activity, or Ecadherin expression in Aldefluor<sup>+</sup> cells isolated from the pancreas of PdxCre;R26<sup>DTR</sup> on days 3 post DT-treatment, showing expansion of Aldefluor<sup>+</sup> cells following DT/DTR-mediated cell ablation (n=3). (C, D) Pancreatic tissues obtained from PdxCre;R26<sup>DTR/mTomG</sup> mice on day 3 post DT-treatment were immunostained for the endothelial marker PECAM (C), or macrophage marker F4/80 (D). The mTomato<sup>+</sup>/mGFP<sup>+</sup> cells did not express PECAM or F4/80, indicating that these are not endothelial cells nor macrophages. Arrows in (C) and (D) mark mTomato<sup>+</sup>/mGFP<sup>+</sup>/PECAM<sup>-</sup>, or mTomato<sup>+</sup>/mGFP<sup>+</sup>/F480<sup>-</sup> cells, respectively. Bars 20  $\mu$ m.

A

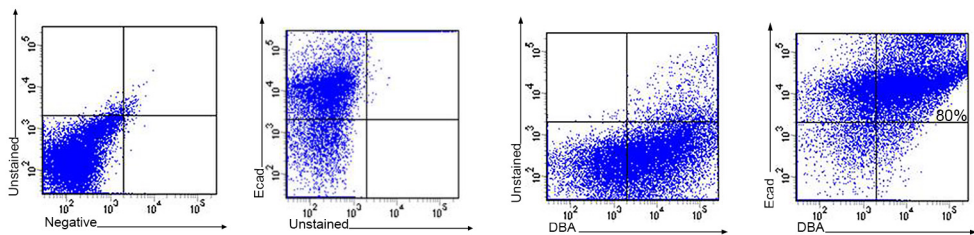

B

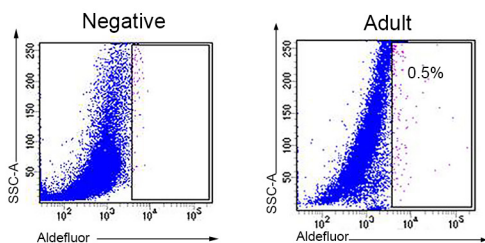

C

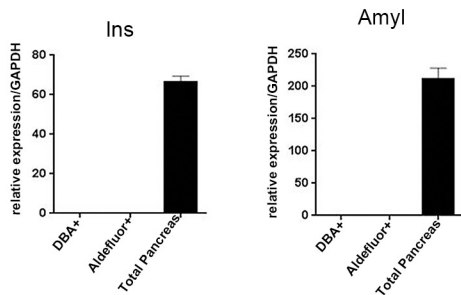

D

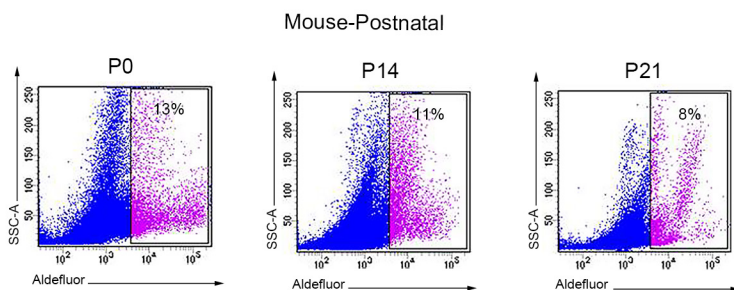

E

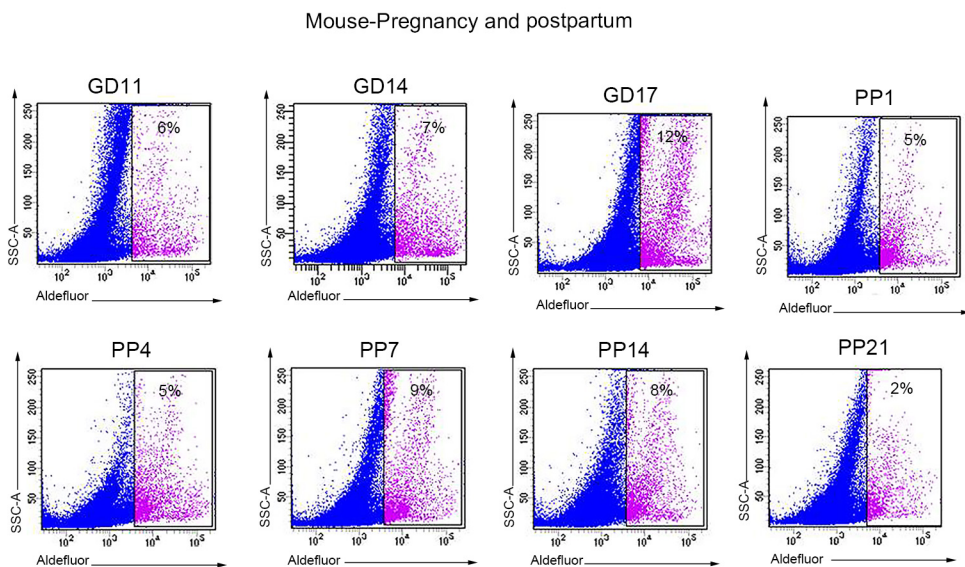

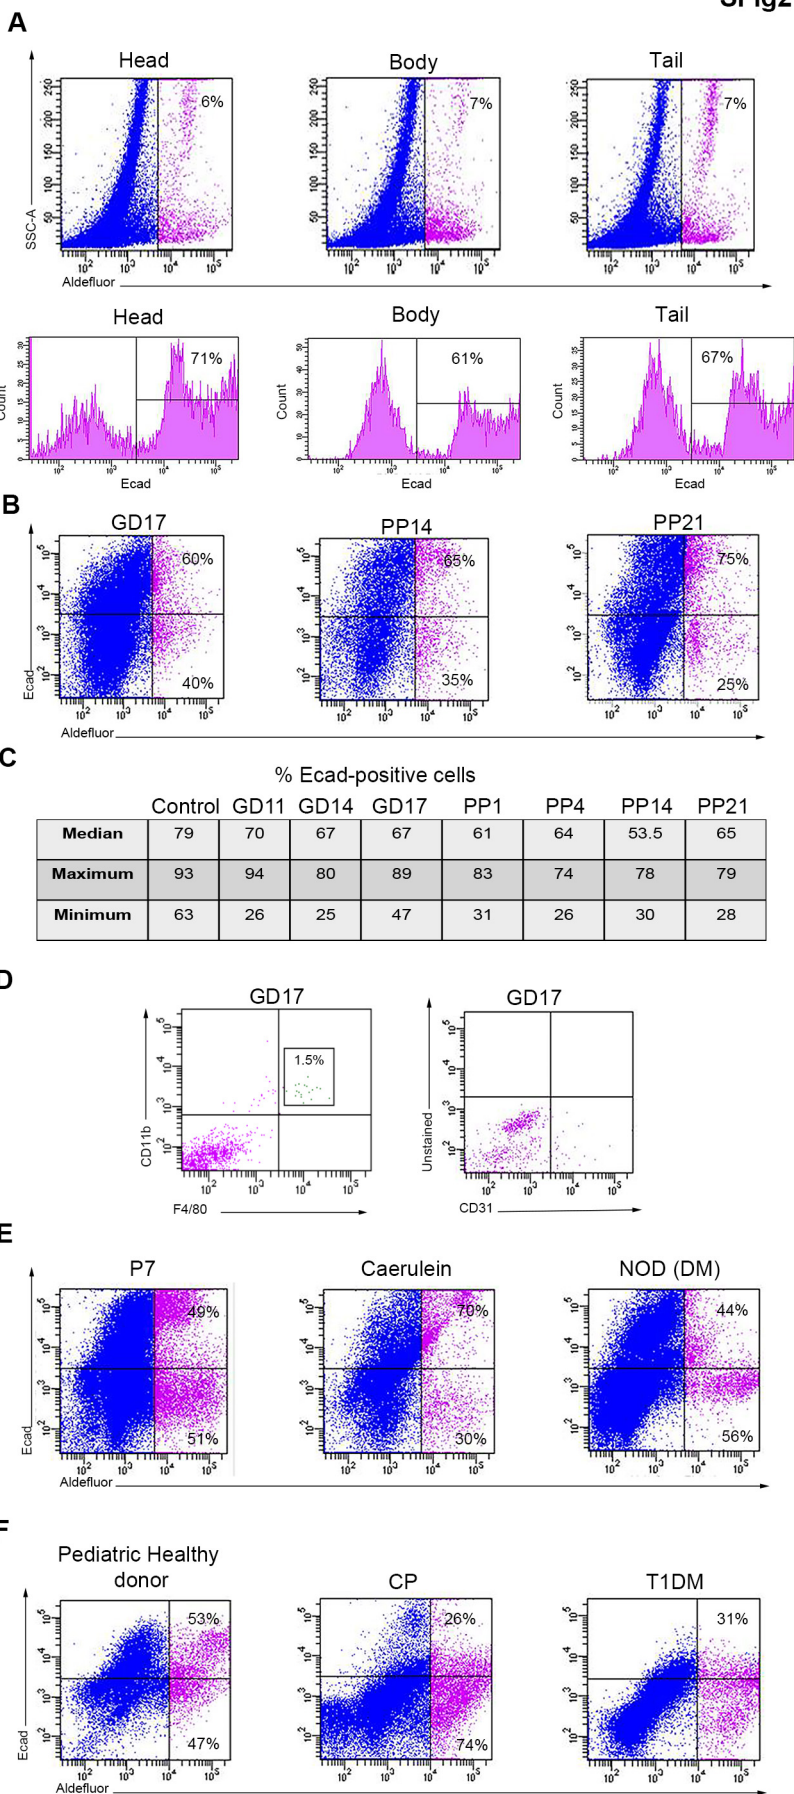

A

Aldefluor+ cell (Non pregnant dams)

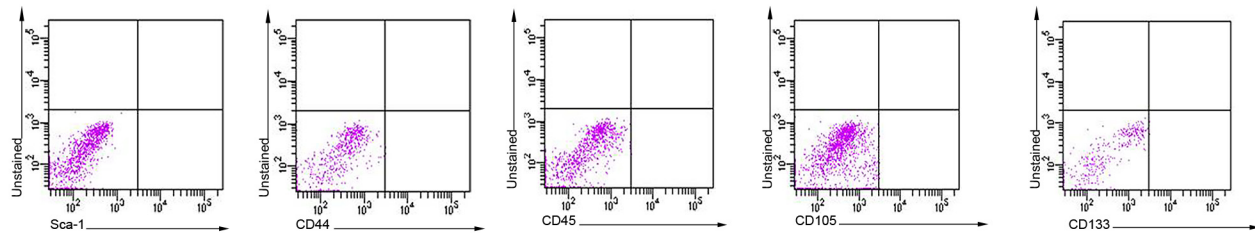

B

Aldefluor+ cell (Pregnant or postpartum dams)

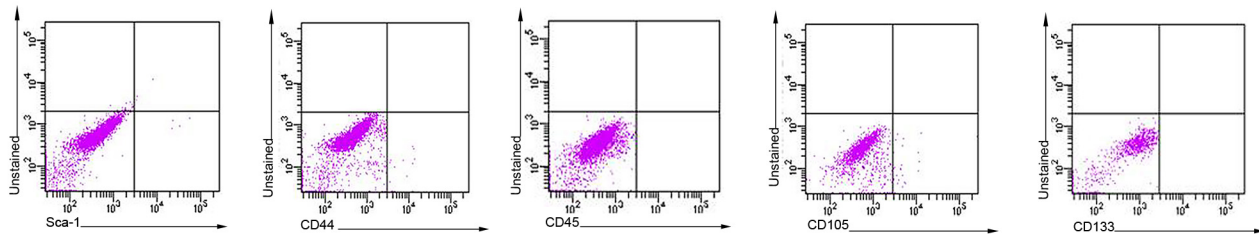



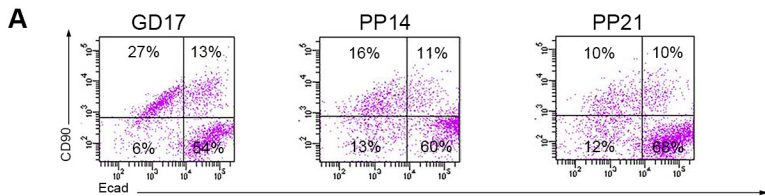**B**

| Number of each Cell Population (x1000) |           |            |             |             |            |            |            |       |
|----------------------------------------|-----------|------------|-------------|-------------|------------|------------|------------|-------|
|                                        | Control   | GD11       | GD14        | GD17        | PP1        | PP4        | PP14       | PP21  |
| CD90 <sup>+</sup> /Ecad <sup>-</sup>   | 21.6± 9.6 | 95.4± 8.4  | 29.0± 4.9   | 42.5± 9.6   | 45.8±27.1  | 80.0± 47.0 | 67.9± 6.7  | 40.4  |
| CD90 <sup>-</sup> / Ecad <sup>-</sup>  | ---       | ---        | 99.2 ± 40.7 | 184.4± 86.8 | 58.9±12.7  | 64.0± 34.3 | 52.8±23.1  | 32.0  |
| CD90 <sup>-</sup> / Ecad <sup>+</sup>  | ---       | ---        | 23.7± 12.9  | 101.0± 17.5 | 27.8±16.8  | 25.2± 10.7 | 49.9± 6.0  | 36.1  |
| CD90 <sup>+</sup> / Ecad <sup>+</sup>  | 74.2± 9.6 | 204.7± 8.4 | 236.2± 48.3 | 294.5±103.9 | 112.7±27.3 | 180.1±55.6 | 311.0±23.9 | 225.6 |

**C**

| % of each Cell Population             |             |             |             |             |             |             |            |      |
|---------------------------------------|-------------|-------------|-------------|-------------|-------------|-------------|------------|------|
|                                       | Control     | GD11        | GD14        | GD17        | PP1         | PP4         | PP14       | PP21 |
| CD90 <sup>+</sup> /Ecad <sup>-</sup>  | 22.6 ± 10.0 | 31.8 ± 28.1 | 7.3 ± 1.3   | 6.8 ± 1.6   | 18.7 ± 11.0 | 22.9 ± 13.5 | 14.0 ± 1.4 | 12.1 |
| CD90 <sup>-</sup> / Ecad <sup>-</sup> | ---         | ---         | 25.6 ± 10.5 | 29.6 ± 14.0 | 24.0 ± 5.2  | 18.3 ± 9.8  | 11.0 ± 4.8 | 9.6  |
| CD90 <sup>-</sup> / Ecad <sup>+</sup> | ---         | ---         | 6.1 ± 3.3   | 16.2 ± 2.8  | 11.3 ± 6.8  | 7.2 ± 3.1   | 10.4 ± 1.2 | 10.8 |
| CD90 <sup>+</sup> / Ecad <sup>+</sup> | 77.4 ± 10.0 | 68.2 ± 28.1 | 61.0 ± 12.4 | 47.4 ± 16.7 | 46.0 ± 11.2 | 51.6 ± 15.9 | 64.6 ± 5.0 | 67.5 |

**D**

| Presence of Aldefluor <sup>+</sup> /CD90 <sup>+</sup> /Ecad <sup>+</sup> cells |         |     |
|--------------------------------------------------------------------------------|---------|-----|
| GD11                                                                           | (0/5)   | 0%  |
| GD14                                                                           | (4/7)   | 57% |
| GD17                                                                           | (4/5)   | 80% |
| PP1                                                                            | (6/8)   | 75% |
| PP4                                                                            | (16/27) | 59% |
| PP21                                                                           | (1/3)   | 33% |

## CD90-/Ecad-

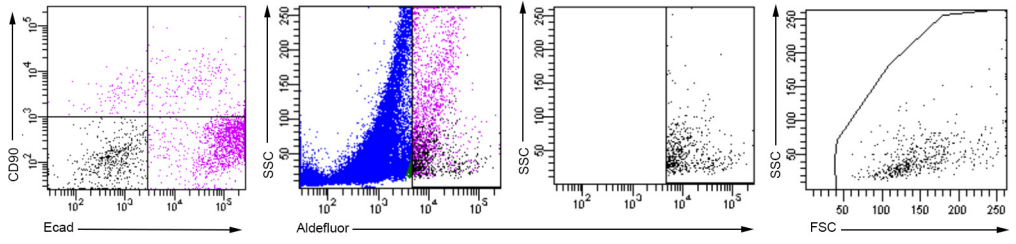

## CD90+/Ecad-

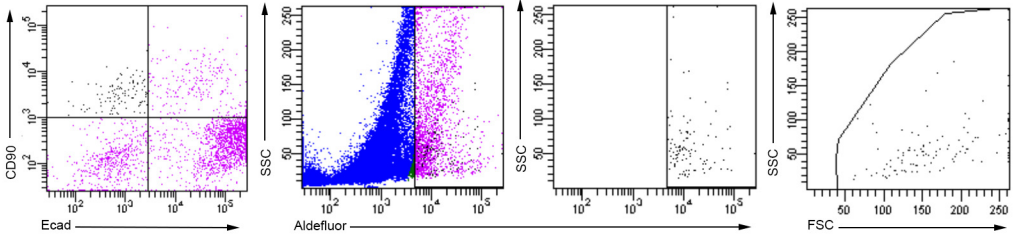

## CD90+/Ecad+

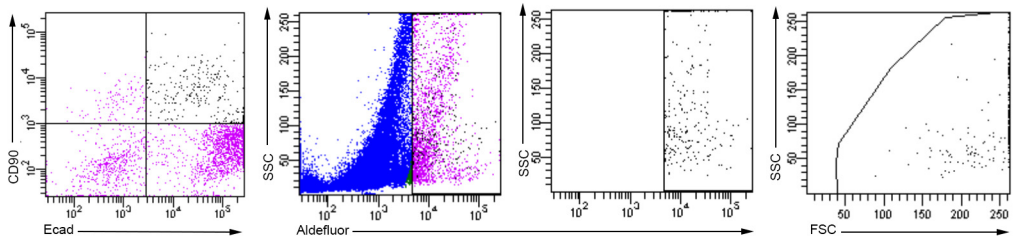

## CD90-/Ecad+

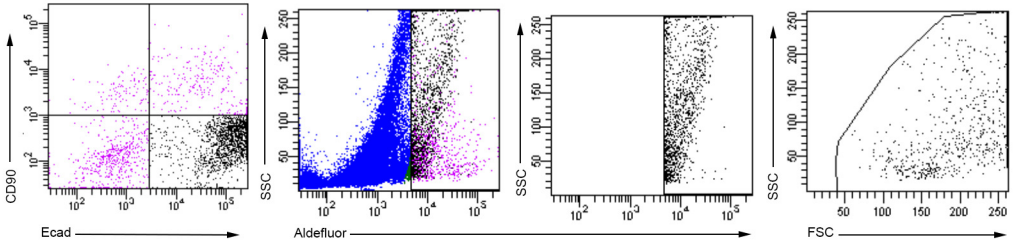

A

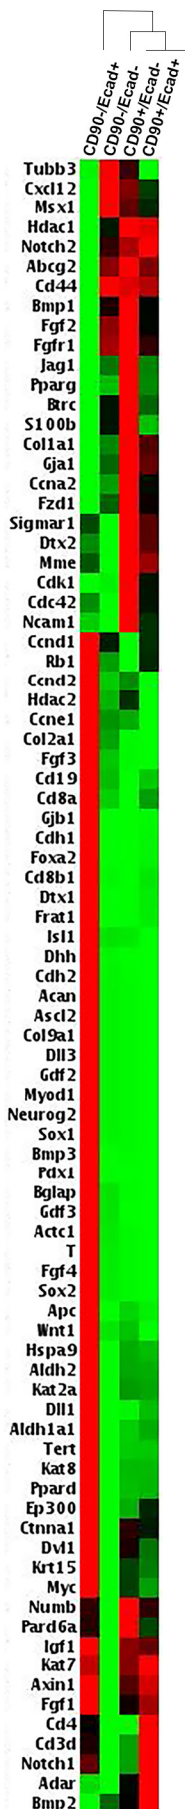

B

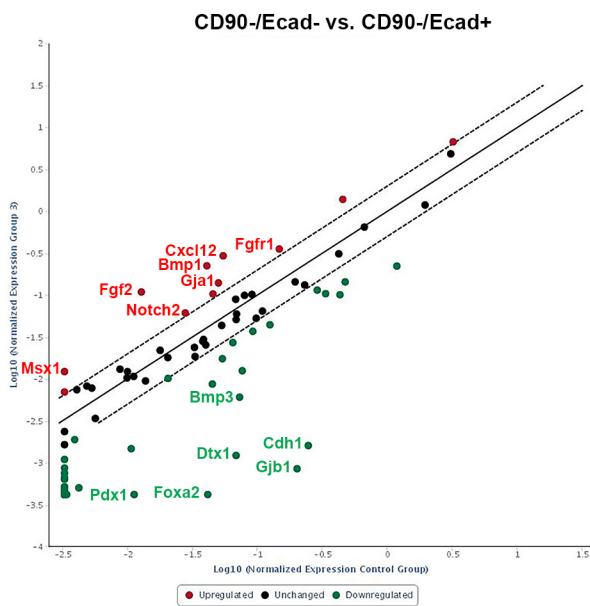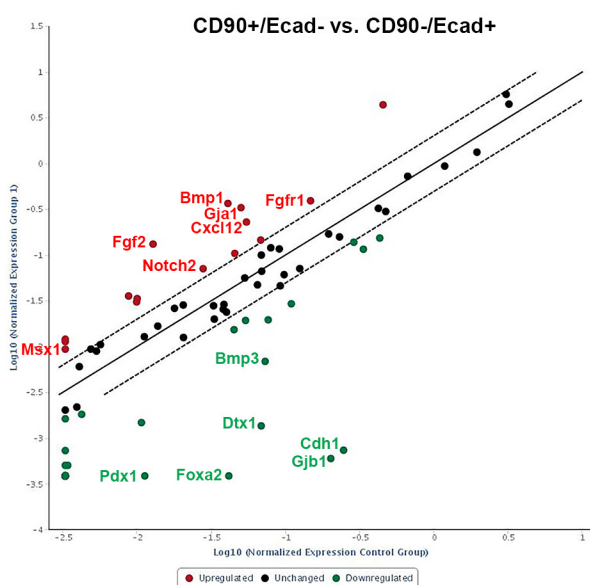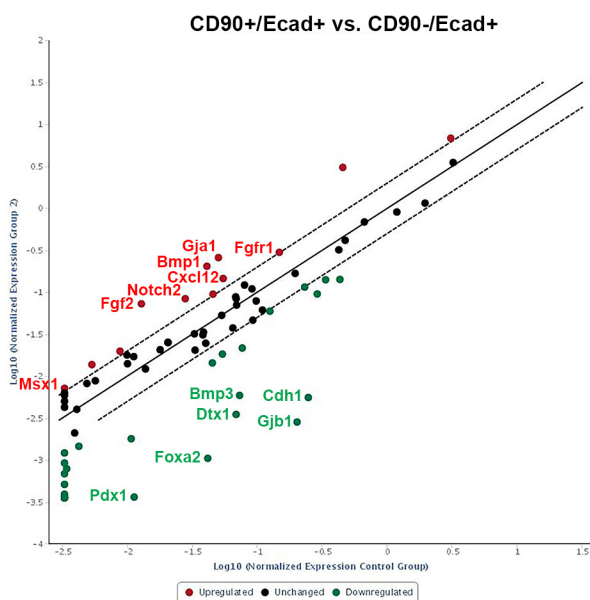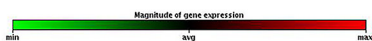

# SFig. 7

E10.5 (dm)

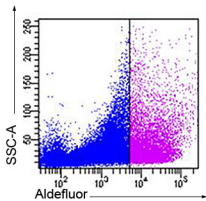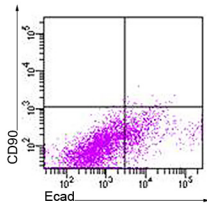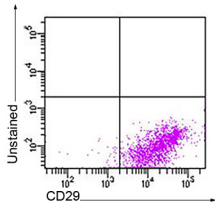

A

DT-treated PdxCre;R26-DTR/LacZ

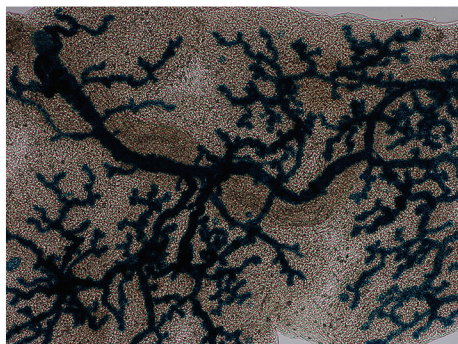

B

PdxCre;R26-DTR DT-treated

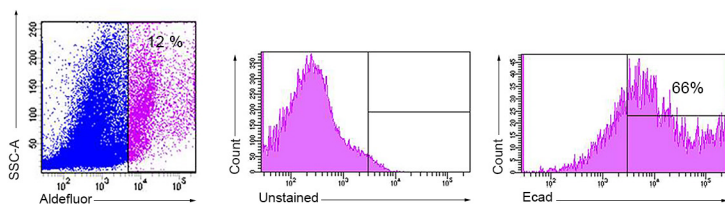

C

PECAM

mTomato

mGFP

Merge

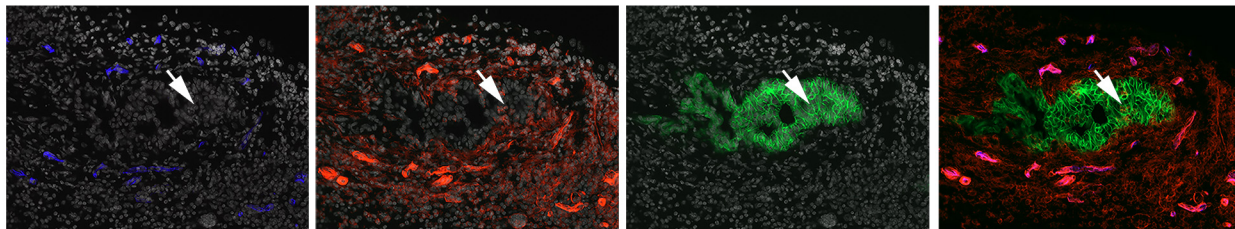

D

F4/80

mTomato

mGFP

Merge

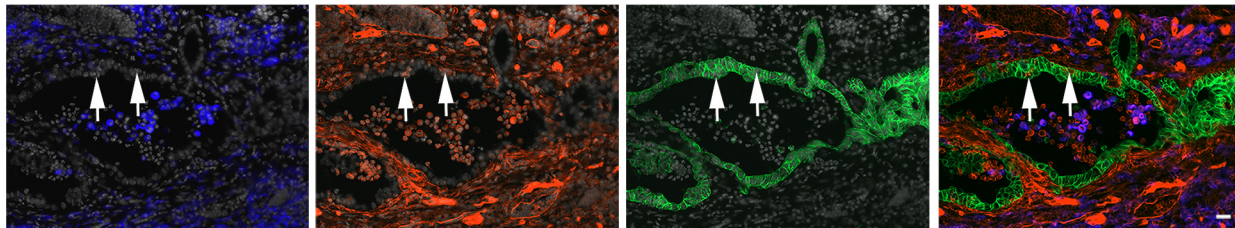

## Supplementary Methods

**Supplementary Table 1: List of antibodies**

| Antigen          | Species    | Company     | Cat. No.    | Dilution                   |
|------------------|------------|-------------|-------------|----------------------------|
| Amylase          | goat       | Santa Cruz  | SC-12281    | 1:300                      |
| BrdU             | mouse      | BD Horizon  | 563445      | 5 µl/test                  |
| CD11b-APC        | mouse      | Miltenyi    | 130-091-241 | 1:20 (Flow)                |
| CD11b-VioBlue    | mouse      | Miltenyi    | 130-097-336 | 1:20 (Flow)                |
| CD326-biotin     | mouse      | Miltenyi    | 130-101-859 | 1:10 (Flow)                |
| CD326-Vioblue    | mouse      | Miltenyi    | 130-102-421 | 1:10 (Flow)                |
| CD29-APC         | mouse      | Miltenyi    | 130-102-557 | 1:10 (Flow)                |
| CD31 (PECAM)     | rat        | BD          | BD550274    | 1:100 (Flow)<br>1:50 (IF)  |
| CD44-APC         | mouse      | Miltenyi    | 130-102-563 | 1:10 (Flow)                |
| CD45-APC         | mouse      | Miltenyi    | 130-102-544 | 1:10 (Flow)                |
| CD90.1-VioBlue   | mouse      | Miltenyi    | 130-102-637 | 1:10 (Flow)                |
| CD105-APC        | mouse      | Miltenyi    | 130-102-495 | 1:10 (Flow)                |
| CD133-APC        | mouse      | Miltenyi    | 130-102-197 | 1:10 (Flow)                |
| Cytokeratin      | rabbit     | Dako        | Z0622       | 1:100 (IF)                 |
| DBA              | Fitc       | Vector Lab  | FL1031-2    | 1:100 (IF)                 |
| DBA              | biotin     | Vector Lab  | B1035       | 1:100 (Flow, IF)           |
| DCLK1            | rabbit     | Abcam       | ab37994     | 1:33 (Flow)                |
| Ecad             | goat       | R&D         | AF748       | 1:200 (IF)<br>1:100 (Flow) |
| F4/80            | rat        | Invitrogen  | MF48000     | 1:100 (IF)                 |
| F/480 eFluor 660 | rat        | eBioscience | 50-4801-82  | 1:100 (Flow)               |
| Insulin          | guinea pig | DAKO        | Millipore   | 1:1000                     |
| PDX1             | goat       | Abcam       | Ab47383     | 1:10000 (IF)               |
| PSA-NCAM-APC     | mouse      | Miltenyi    | 130-093-273 | 1:10 (Flow)                |
| Sca-1-APC        | mouse      | Miltenyi    | 130-102-343 | 1:10 (Flow)                |

All of the secondary antibodies used for Immunostaining were purchased from Jackson ImmunoResearch Laboratories: biotin-conjugated anti-rabbit (1:500), biotin-conjugated anti-rat (1:500), biotin conjugated anti-guinea pig (1:500), biotin-conjugated anti-goat (1:250); Cy2-conjugated streptavidin (1:500); Cy3-conjugated streptavidin (1:500); Cy5-conjugated streptavidin (1:100); and Cy2- and Cy3- anti-guinea pig, anti-rabbit, anti-rat, anti-goat (all 1:300). For flow cytometry, secondary antibodies used were Cy5 anti-goat, anti-rat, anti-rabbit (1:100), Cy5-conjugated streptavidin (1:100) and Donkey anti-Goat IgG (H+L) Alexa Fluor® 350 conjugate (Thermo fisher).

## Supplementary Table 2: List of primers

| <b>Primers</b> |       |        |                |            |
|----------------|-------|--------|----------------|------------|
| Amy            | mouse | Qiagen | Mm_Amy2a5_2_SG | QT01766961 |
| GAPDH          | mouse | Qiagen | Mm_Gapdh_3_SG  | QT01658692 |
| Ins2           | mouse | Qiagen | Mm_Ins2_1_SG   | QT00114289 |
